# Supplementary material for: Comparing Freeze-Thaw Cycle Effects on Pork Loin and Belly Quality and Muscle Characteristics
Source: Research Square preprint supplement (doi:10.21203/rs.3.rs-6850843/v1), 2025-07-03
Supplement: Supplementary file 1 [file c88548d4278626c34b681efa.docx]

**Supplementary material**

Table 1. Raw data of meat color and pH in the belly

| Freeze-thaw cycles | L* | a* | b* | pH |
| --- | --- | --- | --- | --- |
| Fresh meat | 52.67 | 12.53 | 11.83 | 5.75 |
| Fresh meat | 54.03 | 10.93 | 13.43 | 5.74 |
| Fresh meat | 53.73 | 12.30 | 12.07 | 5.76 |
| Fresh meat | 53.57 | 12.37 | 11.37 | 5.75 |
| Fresh meat | 51.73 | 12.00 | 11.80 | 5.74 |
| Fresh meat | 52.60 | 10.87 | 12.30 | 5.70 |
| Fresh meat | 53.07 | 12.60 | 11.97 | 5.74 |
| Fresh meat | 53.60 | 11.43 | 12.43 | 5.71 |
| Fresh meat | 53.73 | 12.07 | 12.40 | 5.74 |
| Fresh meat | 52.30 | 10.87 | 12.30 | 5.65 |
| F-T cycle 1 | 53.17 | 12.00 | 14.43 | 5.73 |
| F-T cycle 1 | 54.23 | 12.60 | 13.90 | 5.69 |
| F-T cycle 1 | 52.20 | 10.87 | 13.60 | 5.71 |
| F-T cycle 1 | 53.57 | 12.17 | 13.07 | 5.71 |
| F-T cycle 1 | 52.50 | 11.53 | 13.83 | 5.72 |
| F-T cycle 1 | 53.63 | 10.97 | 14.10 | 5.62 |
| F-T cycle 1 | 53.13 | 11.90 | 14.03 | 5.66 |
| F-T cycle 1 | 51.50 | 9.73 | 15.97 | 5.65 |
| F-T cycle 1 | 53.60 | 11.97 | 14.20 | 5.71 |
| F-T cycle 1 | 54.27 | 9.30 | 15.27 | 5.62 |
| F-T cycle 2 | 54.33 | 8.10 | 15.03 | 5.72 |
| F-T cycle 2 | 53.73 | 10.33 | 14.37 | 5.72 |
| F-T cycle 2 | 53.63 | 8.30 | 14.07 | 5.73 |
| F-T cycle 2 | 55.03 | 10.30 | 15.13 | 5.74 |
| F-T cycle 2 | 54.50 | 8.03 | 15.23 | 5.72 |
| F-T cycle 2 | 55.07 | 10.90 | 15.97 | 5.69 |
| F-T cycle 2 | 54.20 | 11.77 | 14.63 | 5.73 |
| F-T cycle 2 | 55.43 | 7.23 | 16.63 | 5.69 |
| F-T cycle 2 | 53.57 | 10.80 | 14.67 | 5.72 |
| F-T cycle 2 | 55.93 | 10.77 | 16.13 | 5.65 |
| F-T cycle 3 | 55.03 | 10.63 | 15.87 | 5.76 |
| F-T cycle 3 | 54.40 | 10.80 | 15.80 | 5.58 |
| F-T cycle 3 | 55.67 | 11.53 | 15.10 | 5.73 |
| F-T cycle 3 | 55.07 | 10.43 | 15.37 | 5.70 |
| F-T cycle 3 | 55.50 | 10.50 | 15.33 | 5.64 |
| F-T cycle 3 | 54.30 | 9.63 | 15.83 | 5.71 |
| F-T cycle 3 | 54.43 | 10.83 | 14.77 | 5.75 |
| F-T cycle 3 | 56.10 | 10.37 | 15.87 | 5.72 |
| F-T cycle 3 | 56.10 | 11.37 | 15.63 | 5.56 |
| F-T cycle 3 | 55.83 | 7.83 | 15.37 | 5.69 |
| F-T cycle 4 | 55.77 | 10.37 | 16.93 | 5.62 |
| F-T cycle 4 | 55.13 | 10.87 | 16.90 | 5.88 |
| F-T cycle 4 | 54.97 | 10.60 | 16.33 | 5.78 |
| F-T cycle 4 | 56.63 | 11.40 | 15.73 | 5.66 |
| F-T cycle 4 | 48.67 | 10.40 | 16.47 | 5.62 |
| F-T cycle 4 | 53.73 | 9.97 | 16.10 | 5.64 |
| F-T cycle 4 | 55.90 | 11.23 | 16.23 | 5.69 |
| F-T cycle 4 | 55.23 | 9.97 | 16.93 | 5.76 |
| F-T cycle 4 | 55.63 | 10.77 | 16.37 | 5.81 |
| F-T cycle 4 | 57.07 | 9.83 | 16.47 | 5.59 |

Table 2. Raw data of meat color and pH in the belly

| Freeze-thaw cycles | L* | a* | b* | pH |
| --- | --- | --- | --- | --- |
| Fresh meat | 55.13 | 6.97 | 14.03 | 6.13 |
| Fresh meat | 55.10 | 7.70 | 14.10 | 6.03 |
| Fresh meat | 56.27 | 6.63 | 15.27 | 6.03 |
| Fresh meat | 66.30 | 12.13 | 12.03 | 5.94 |
| Fresh meat | 63.63 | 9.90 | 12.93 | 6.02 |
| Fresh meat | 53.10 | 7.33 | 12.07 | 6.02 |
| Fresh meat | 75.40 | 13.57 | 13.07 | 6.03 |
| Fresh meat | 63.03 | 9.20 | 13.20 | 5.87 |
| Fresh meat | 69.67 | 12.83 | 12.47 | 6.07 |
| Fresh meat | 56.90 | 7.57 | 14.70 | 5.8 |
| F-T cycle 1 | 51.20 | 5.87 | 14.17 | 5.04 |
| F-T cycle 1 | 52.90 | 6.53 | 13.47 | 5.97 |
| F-T cycle 1 | 49.97 | 3.60 | 15.70 | 5.94 |
| F-T cycle 1 | 63.33 | 10.10 | 14.63 | 5.87 |
| F-T cycle 1 | 59.73 | 8.83 | 13.60 | 5.86 |
| F-T cycle 1 | 51.13 | 4.67 | 14.87 | 5.95 |
| F-T cycle 1 | 64.67 | 7.73 | 16.53 | 5.99 |
| F-T cycle 1 | 58.20 | 8.20 | 14.97 | 5.8 |
| F-T cycle 1 | 72.17 | 13.23 | 13.37 | 5.99 |
| F-T cycle 1 | 60.13 | 7.93 | 15.63 | 5.75 |
| F-T cycle 2 | 63.17 | 8.57 | 15.17 | 6.08 |
| F-T cycle 2 | 61.90 | 9.33 | 14.83 | 6.03 |
| F-T cycle 2 | 70.37 | 11.83 | 14.33 | 6.01 |
| F-T cycle 2 | 73.60 | 12.03 | 15.40 | 5.94 |
| F-T cycle 2 | 66.10 | 9.53 | 16.77 | 5.9 |
| F-T cycle 2 | 62.13 | 8.87 | 14.67 | 6.01 |
| F-T cycle 2 | 68.50 | 10.77 | 13.67 | 6.05 |
| F-T cycle 2 | 58.20 | 6.40 | 16.57 | 5.87 |
| F-T cycle 2 | 76.37 | 14.03 | 13.53 | 6.03 |
| F-T cycle 2 | 59.80 | 7.77 | 14.17 | 5.79 |
| F-T cycle 3 | 62.60 | 7.23 | 16.10 | 6 |
| F-T cycle 3 | 71.80 | 10.93 | 14.97 | 5.87 |
| F-T cycle 3 | 64.33 | 7.37 | 16.83 | 5.92 |
| F-T cycle 3 | 61.20 | 7.87 | 16.17 | 6.28 |
| F-T cycle 3 | 65.37 | 8.83 | 15.87 | 5.93 |
| F-T cycle 3 | 70.50 | 10.20 | 15.50 | 5.88 |
| F-T cycle 3 | 77.63 | 12.53 | 14.73 | 5.98 |
| F-T cycle 3 | 65.90 | 8.83 | 15.63 | 5.85 |
| F-T cycle 3 | 73.47 | 11.67 | 15.03 | 6.05 |
| F-T cycle 3 | 67.97 | 10.03 | 15.43 | 5.84 |
| F-T cycle 4 | 64.63 | 7.53 | 16.63 | 5.98 |
| F-T cycle 4 | 68.87 | 10.50 | 15.73 | 6.06 |
| F-T cycle 4 | 64.60 | 6.57 | 18.53 | 5.97 |
| F-T cycle 4 | 69.67 | 10.30 | 17.67 | 6.1 |
| F-T cycle 4 | 66.30 | 9.27 | 17.20 | 5.85 |
| F-T cycle 4 | 62.47 | 6.60 | 15.17 | 6.05 |
| F-T cycle 4 | 66.60 | 6.87 | 17.87 | 6.02 |
| F-T cycle 4 | 61.30 | 7.47 | 16.03 | 6.08 |
| F-T cycle 4 | 66.20 | 9.73 | 16.60 | 6.01 |
| F-T cycle 4 | 58.70 | 7.07 | 16.27 | 6.04 |

Table 3. Raw data of moisture, protein and fat content in the loin

| Freeze-thaw cycles | Moisture (%) | Protein (%) | Fat (%) |
| --- | --- | --- | --- |
| Fresh meat | 68.542 | 27.68 | 3.78 |
| Fresh meat | 71.113 | 25.23 | 3.65 |
| Fresh meat | 71.655 | 25.89 | 2.46 |
| Fresh meat | 69.466 | 26.70 | 3.83 |
| F-T cycle 1 | 69.672 | 26.81 | 3.52 |
| F-T cycle 1 | 68.314 | 27.84 | 3.84 |
| F-T cycle 1 | 64.765 | 31.06 | 4.17 |
| F-T cycle 1 | 69.378 | 25.57 | 5.05 |
| F-T cycle 2 | 66.137 | 28.54 | 5.33 |
| F-T cycle 2 | 69.015 | 26.75 | 4.23 |
| F-T cycle 2 | 68.285 | 28.33 | 3.38 |
| F-T cycle 2 | 63.970 | 28.80 | 7.23 |
| F-T cycle 3 | 67.999 | 26.67 | 5.33 |
| F-T cycle 3 | 65.416 | 29.70 | 4.89 |
| F-T cycle 3 | 66.241 | 30.01 | 3.75 |
| F-T cycle 3 | 67.960 | 27.58 | 4.46 |
| F-T cycle 4 | 67.777 | 27.08 | 5.14 |
| F-T cycle 4 | 68.536 | 26.19 | 5.27 |
| F-T cycle 4 | 69.434 | 25.53 | 5.04 |
| F-T cycle 4 | 69.016 | 25.99 | 4.99 |

Table 4. Raw data of moisture, protein and fat content in the belly

| Freeze-thaw cycles | Moisture (%) | Protein (%) | Fat (%) |
| --- | --- | --- | --- |
| Fresh meat | 61.32 | 15.88 | 25.80 |
| Fresh meat | 60.48 | 14.16 | 25.36 |
| Fresh meat | 59.39 | 13.32 | 27.29 |
| Fresh meat | . | . | . |
| F-T cycle 1 | 63.06 | 7.53 | 29.41 |
| F-T cycle 1 | 49.53 | 24.68 | 25.79 |
| F-T cycle 1 | 57.98 | 15.90 | 26.11 |
| F-T cycle 1 | 61.11 | 13.26 | 25.63 |
| F-T cycle 2 | 55.28 | 12.66 | 32.07 |
| F-T cycle 2 | . | . | . |
| F-T cycle 2 | 55.00 | 17.84 | 27.17 |
| F-T cycle 2 | 57.28 | 17.39 | 25.33 |
| F-T cycle 3 | 57.24 | 9.98 | 32.79 |
| F-T cycle 3 | 53.06 | 17.24 | 29.70 |
| F-T cycle 3 | 53.86 | 18.82 | 27.32 |
| F-T cycle 3 | 59.90 | 17.73 | 22.37 |
| F-T cycle 4 | 58.61 | 9.33 | 32.07 |
| F-T cycle 4 | 49.64 | 21.03 | 29.33 |
| F-T cycle 4 | 52.79 | 17.28 | 29.93 |
| F-T cycle 4 | 59.20 | 12.78 | 28.03 |

Table 5. Raw data of thawing loss in the loin

| Freeze-thaw cycles | Thawing loss (%) |
| --- | --- |
| F-T cycle 1 | 8.73 |
| F-T cycle 1 | 10.99 |
| F-T cycle 1 | 0.66 |
| F-T cycle 1 | 24.22 |
| F-T cycle 1 | 9.02 |
| F-T cycle 1 | 7.15 |
| F-T cycle 1 | 6.41 |
| F-T cycle 1 | 10.40 |
| F-T cycle 1 | 8.07 |
| F-T cycle 1 | 6.33 |
| F-T cycle 2 | 7.30 |
| F-T cycle 2 | 2.61 |
| F-T cycle 2 | 3.19 |
| F-T cycle 2 | 8.19 |
| F-T cycle 2 | 2.60 |
| F-T cycle 2 | 4.05 |
| F-T cycle 2 | 5.25 |
| F-T cycle 2 | 2.75 |
| F-T cycle 2 | 2.74 |
| F-T cycle 2 | 6.06 |
| F-T cycle 3 | 2.71 |
| F-T cycle 3 | 1.06 |
| F-T cycle 3 | 1.55 |
| F-T cycle 3 | 1.30 |
| F-T cycle 3 | 3.90 |
| F-T cycle 3 | 3.52 |
| F-T cycle 3 | 3.08 |
| F-T cycle 3 | 1.90 |
| F-T cycle 3 | 1.97 |
| F-T cycle 3 | 2.49 |
| F-T cycle 4 | 1.41 |
| F-T cycle 4 | 2.04 |
| F-T cycle 4 | 1.22 |
| F-T cycle 4 | 1.52 |
| F-T cycle 4 | 0.84 |
| F-T cycle 4 | 1.18 |
| F-T cycle 4 | 1.24 |
| F-T cycle 4 | 2.54 |
| F-T cycle 4 | 0.75 |
| F-T cycle 4 | 1.20 |

Table 6. Raw data of thawing loss in the belly

| Freeze-thaw cycles | Thawing loss (%) |
| --- | --- |
| F-T cycle 1 | 0.45 |
| F-T cycle 1 | 0.81 |
| F-T cycle 1 | 0.67 |
| F-T cycle 1 | 1.05 |
| F-T cycle 1 | 1.54 |
| F-T cycle 1 | 0.76 |
| F-T cycle 1 | 0.82 |
| F-T cycle 1 | 1.53 |
| F-T cycle 1 | 0.78 |
| F-T cycle 1 | 1.34 |
| F-T cycle 2 | 0.55 |
| F-T cycle 2 | 0.61 |
| F-T cycle 2 | 0.68 |
| F-T cycle 2 | 1.01 |
| F-T cycle 2 | 1.14 |
| F-T cycle 2 | 0.89 |
| F-T cycle 2 | 0.73 |
| F-T cycle 2 | 2.98 |
| F-T cycle 2 | 0.77 |
| F-T cycle 2 | 1.84 |
| F-T cycle 3 | 0.26 |
| F-T cycle 3 | 1.34 |
| F-T cycle 3 | 0.99 |
| F-T cycle 3 | 0.19 |
| F-T cycle 3 | 0.63 |
| F-T cycle 3 | 0.30 |
| F-T cycle 3 | 0.24 |
| F-T cycle 3 | 3.53 |
| F-T cycle 3 | 0.30 |
| F-T cycle 3 | 0.47 |
| F-T cycle 4 | 0.16 |
| F-T cycle 4 | 0.36 |
| F-T cycle 4 | 2.20 |
| F-T cycle 4 | 0.47 |
| F-T cycle 4 | 0.74 |
| F-T cycle 4 | 0.00 |
| F-T cycle 4 | 0.67 |
| F-T cycle 4 | 0.37 |
| F-T cycle 4 | 0.00 |
| F-T cycle 4 | 0.82 |

Table 7. Raw data of cooking loss in the loin

| Freeze-thaw cycles | Cooking loss (%) |
| --- | --- |
| Fresh meat | 34.90 |
| Fresh meat | 34.15 |
| Fresh meat | 32.82 |
| Fresh meat | 34.19 |
| Fresh meat | 30.93 |
| Fresh meat | 31.71 |
| Fresh meat | 33.19 |
| Fresh meat | 31.44 |
| Fresh meat | 34.14 |
| Fresh meat | 32.60 |
| F-T cycle 4 | 28.77 |
| F-T cycle 4 | 27.63 |
| F-T cycle 4 | 27.44 |
| F-T cycle 4 | 29.07 |
| F-T cycle 4 | 26.43 |
| F-T cycle 4 | 27.25 |
| F-T cycle 4 | 30.08 |
| F-T cycle 4 | 25.82 |
| F-T cycle 4 | 29.56 |
| F-T cycle 4 | 26.14 |

Table 8. Raw data of cooking loss in the belly

| Freeze-thaw cycles | Cooking loss (%) |
| --- | --- |
| Fresh meat | 15.61 |
| Fresh meat | 12.39 |
| Fresh meat | 12.46 |
| Fresh meat | 8.19 |
| Fresh meat | 17.22 |
| Fresh meat | 14.06 |
| Fresh meat | 15.33 |
| Fresh meat | 9.70 |
| Fresh meat | 10.07 |
| Fresh meat | 17.28 |
| F-T cycle 4 | 12.45 |
| F-T cycle 4 | 12.50 |
| F-T cycle 4 | 13.38 |
| F-T cycle 4 | 14.99 |
| F-T cycle 4 | 18.06 |
| F-T cycle 4 | 13.64 |
| F-T cycle 4 | 9.77 |
| F-T cycle 4 | 18.42 |
| F-T cycle 4 | 10.44 |
| F-T cycle 4 | 18.62 |

Table 9. Raw data of muscle characteristics in the loin

| Freeze-thaw cycles | Muscle fiber diameter (μm) | Endomysium thickness (μm) | Perimysium thickness (μm) |
| --- | --- | --- | --- |
| Fresh meat | 39.55 | 12.71 | 41.79 |
| Fresh meat | 44.02 | 11.66 | 50.16 |
| Fresh meat | 47.73 | 20.35 | 84.07 |
| Fresh meat | 63.06 | 13.53 | 108.73 |
| F-T cycle 1 | 56.15 | 17.71 | 72.72 |
| F-T cycle 1 | 55.17 | 11.18 | 97.39 |
| F-T cycle 1 | 60.68 | 13.60 | 98.73 |
| F-T cycle 1 | 51.11 | 13.40 | 79.61 |
| F-T cycle 2 | 54.11 | 18.17 | 119.75 |
| F-T cycle 2 | 46.14 | 17.20 | 61.23 |
| F-T cycle 2 | 46.42 | 15.90 | 79.57 |
| F-T cycle 2 | 38.90 | 16.80 | 61.39 |
| F-T cycle 3 | 59.65 | 13.80 | 55.66 |
| F-T cycle 3 | 48.00 | 10.79 | 51.93 |
| F-T cycle 3 | 41.53 | 7.72 | 74.21 |
| F-T cycle 3 | 58.75 | 11.18 | 107.97 |
| F-T cycle 4 | 46.94 | 7.77 | 90.50 |
| F-T cycle 4 | 58.81 | 12.41 | 115.15 |
| F-T cycle 4 | 40.88 | 4.62 | 28.04 |
| F-T cycle 4 | 42.20 | 8.16 | 48.57 |

Table 10. Raw data of muscle characteristics in the belly

| Freeze-thaw cycles | Muscle fiber diameter (μm) | Endomysium thickness (μm) | Perimysium thickness (μm) |
| --- | --- | --- | --- |
| Fresh meat | 39.11 | 15.90 | 99.65 |
| Fresh meat | 54.28 | 13.65 | 64.32 |
| Fresh meat | 45.92 | 16.52 | 80.06 |
| Fresh meat | 42.02 | 12.61 | 44.76 |
| F-T cycle 1 | 54.74 | 12.85 | 72.63 |
| F-T cycle 1 | 59.46 | 16.12 | 63.45 |
| F-T cycle 1 | 50.19 | 11.36 | 62.94 |
| F-T cycle 1 | 49.59 | 17.42 | 109.10 |
| F-T cycle 2 | 42.99 | 13.35 | 56.44 |
| F-T cycle 2 | 59.23 | 15.40 | 80.72 |
| F-T cycle 2 | 35.82 | 13.25 | 51.57 |
| F-T cycle 2 | 38.60 | 12.65 | 77.08 |
| F-T cycle 3 | 34.60 | 12.68 | 48.89 |
| F-T cycle 3 | 42.63 | 8.81 | 46.62 |
| F-T cycle 3 | 45.67 | 14.95 | 87.14 |
| F-T cycle 3 | 36.62 | 14.31 | 72.45 |
| F-T cycle 4 | 36.02 | 11.50 | 132.58 |
| F-T cycle 4 | 40.97 | 8.84 | 118.87 |
| F-T cycle 4 | 39.51 | 8.54 | 48.45 |
| F-T cycle 4 | 41.60 | 10.50 | 93.13 |
